# Supplementary material for: THE CONTAINMENT OF LIQUID-METAL FUELS AT 500-1000 C
Source: Royal Society of Chemistry journal article supplement (doi:10.1039/d3md00165b), 1963-01-01
Supplement: d3md00165b1.pdf [file d3md00165b1.pdf]

## ANTI PROLIFERATIVE ACTIVITY OF NITROQUINOLONE FUSED ACYLHYDRAZONES AS NON-SMALL CELL HUMAN LUNG CANCER AGENTS

Vandana Nandakumar<sup>a</sup>, Amsaveni Sundarasamy<sup>a</sup>, Kaviyarasu Adhigaman<sup>a</sup>, Sentamil Selvi Ramasamy<sup>a</sup>, Manickam Paulpandi<sup>c</sup>, Gothandam Kodiveri Muthukaliannan<sup>b</sup>, Narayanasamy Arul<sup>c</sup>, Suresh Thangaraj<sup>a\*\*</sup>

\*\*Corresponding Author, mail id: suresh@buc.edu.in

<sup>a</sup> School of Chemical Sciences, Department of Chemistry, Bharathiar University, Coimbatore, Tamilnadu, 641046, India

<sup>b</sup> School of BioSciences and Technology, Vellore Institute of Technology, Vellore 632014, Tamil Nadu, India

<sup>c</sup> School of Life Sciences, Department of Zoology, Bharathiar University, Coimbatore, Tamilnadu, 641046, India

### SUPPLIMENTARY INFORMATION

#### I. <sup>1</sup>H NMR SPECTRA

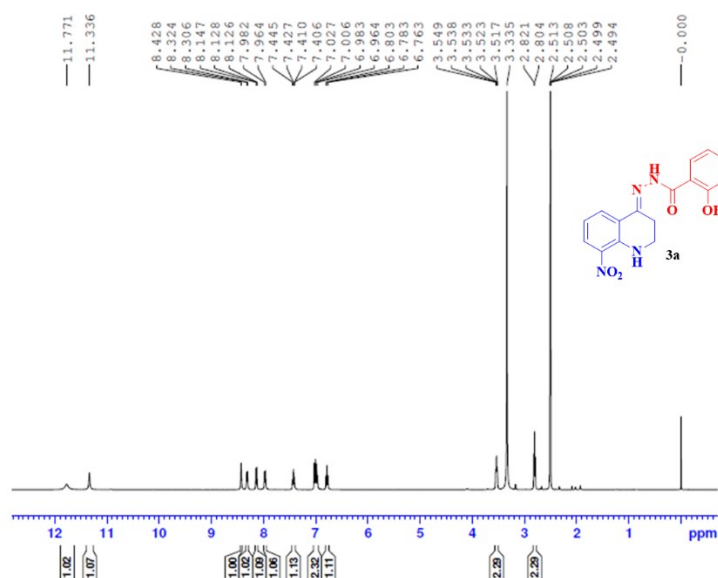

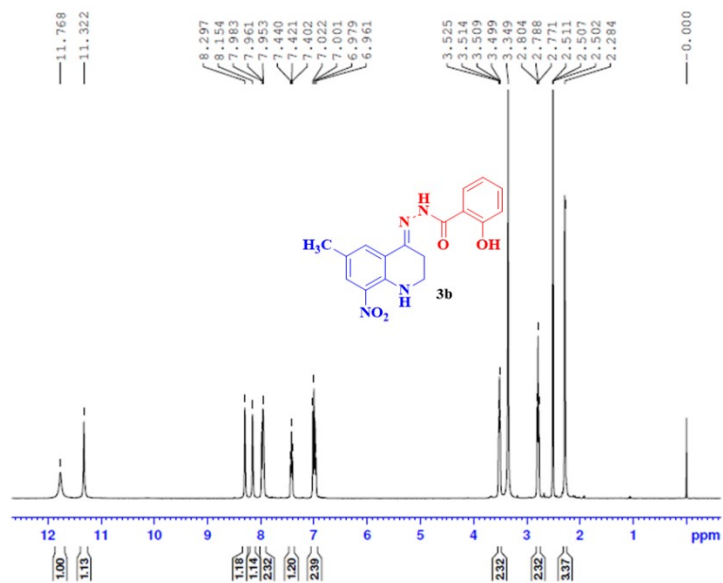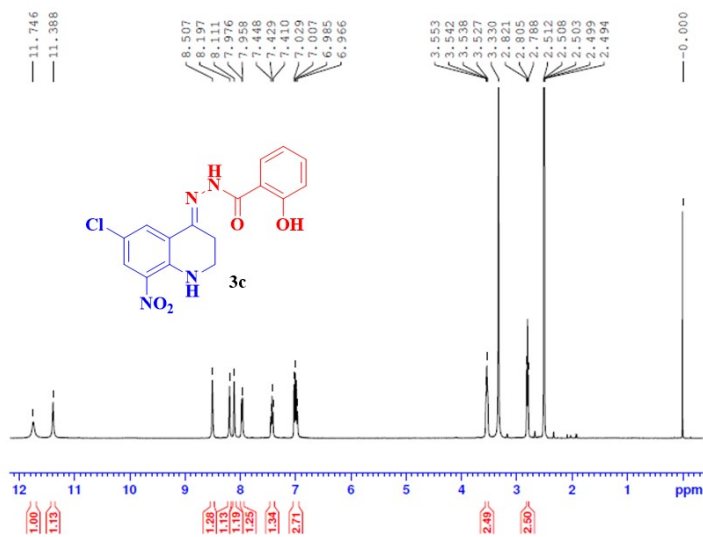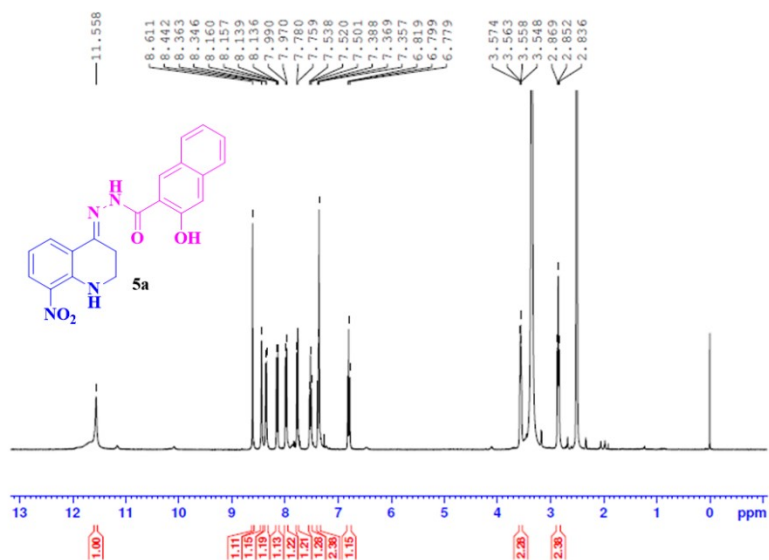

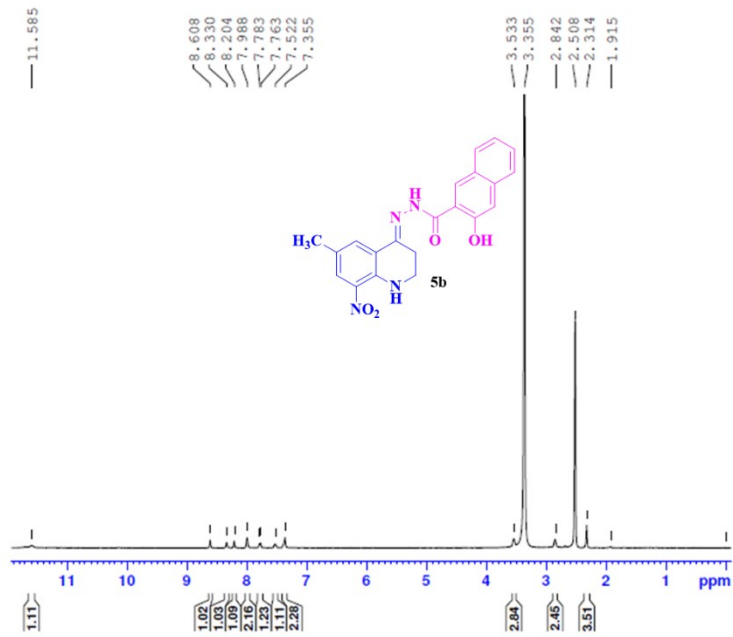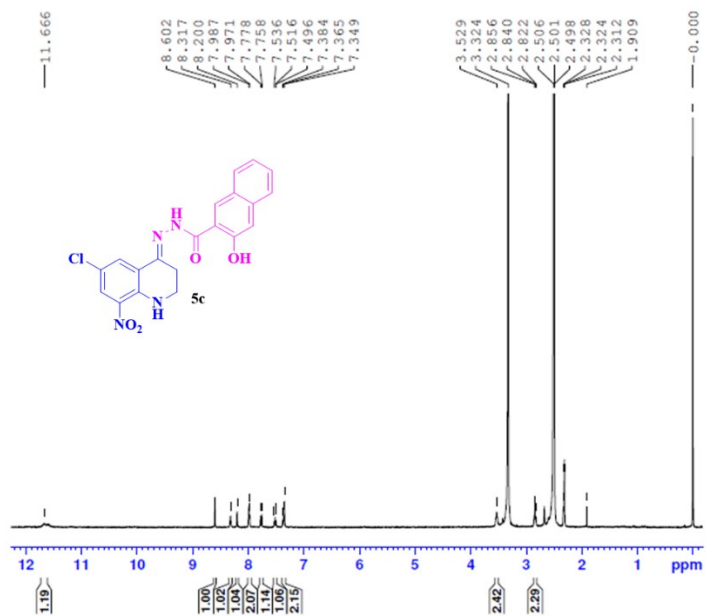

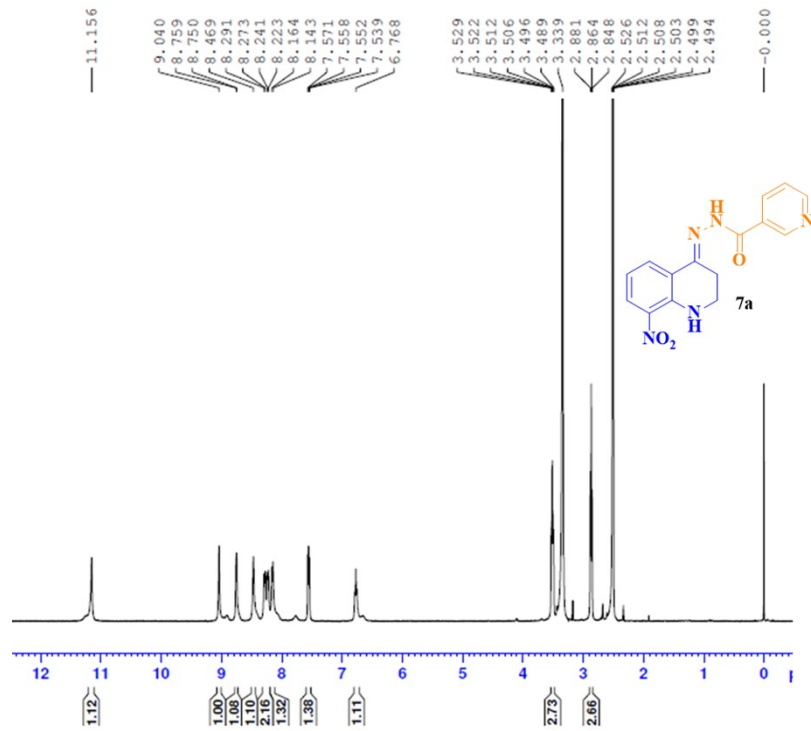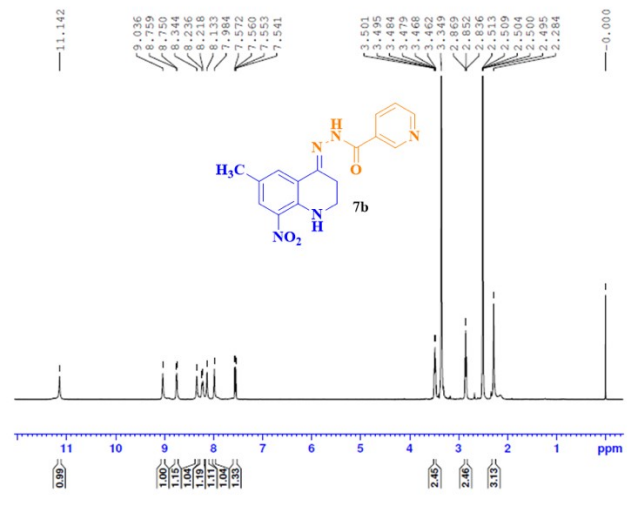

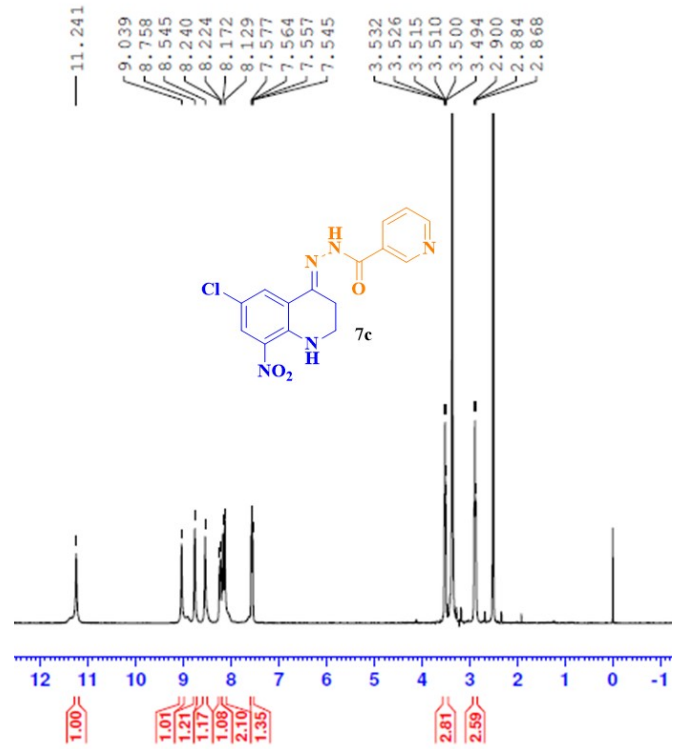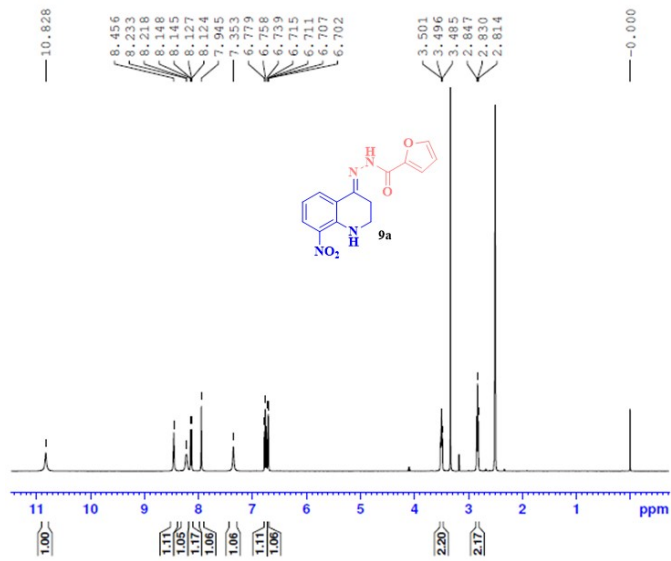

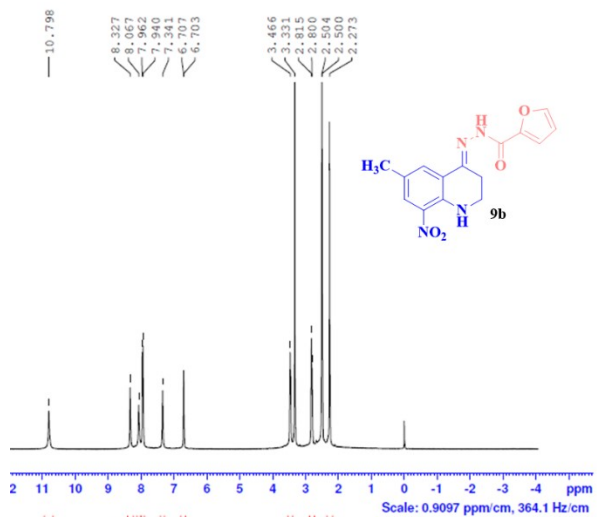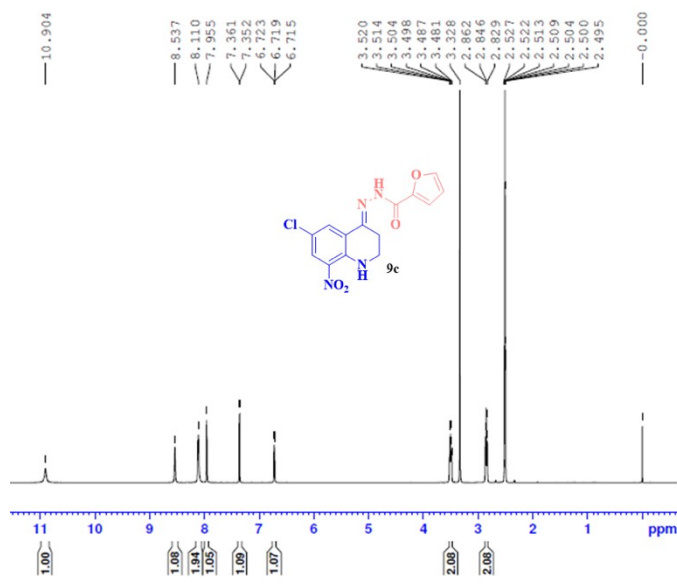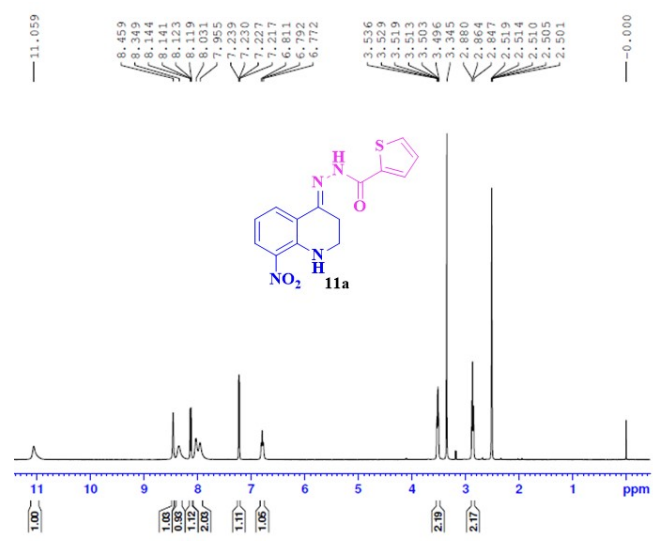

S

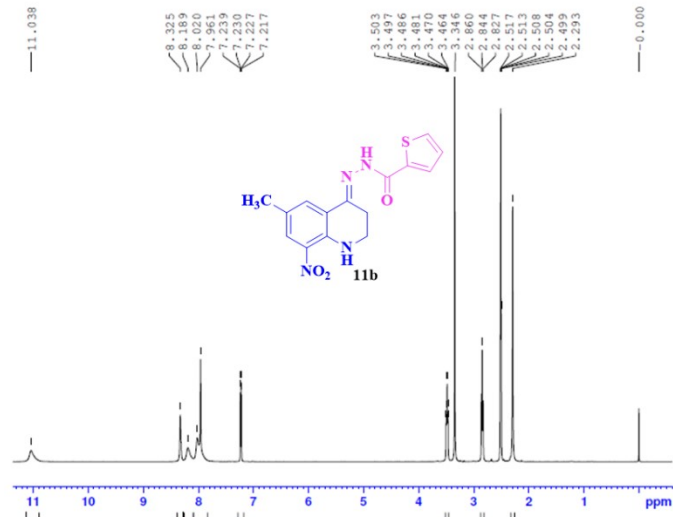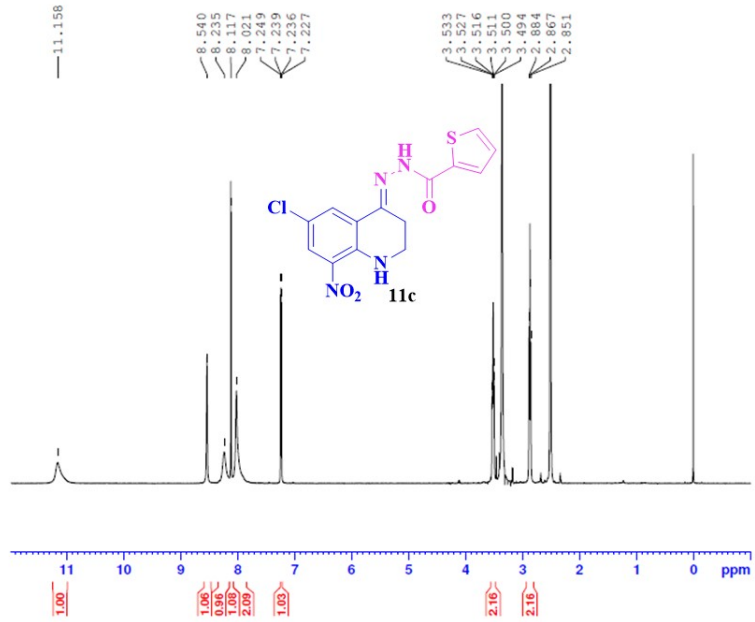

## II. <sup>13</sup>C NMR SPECTRA

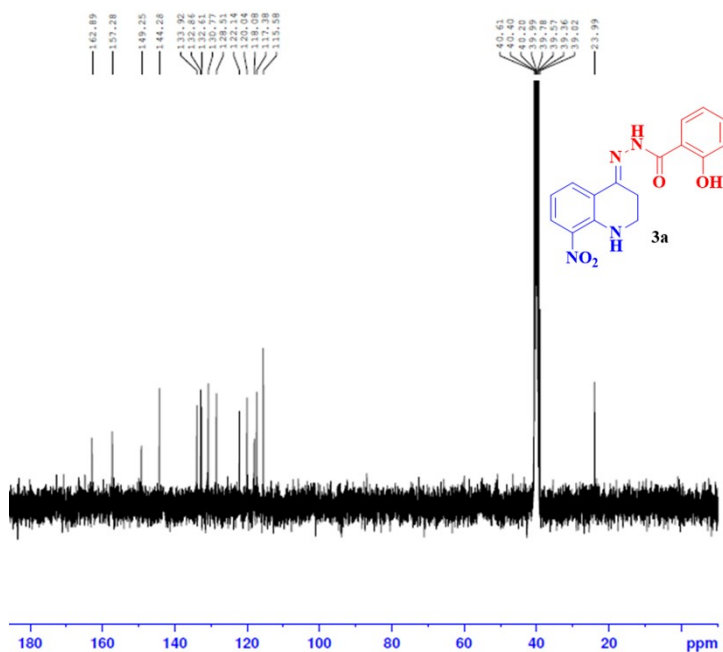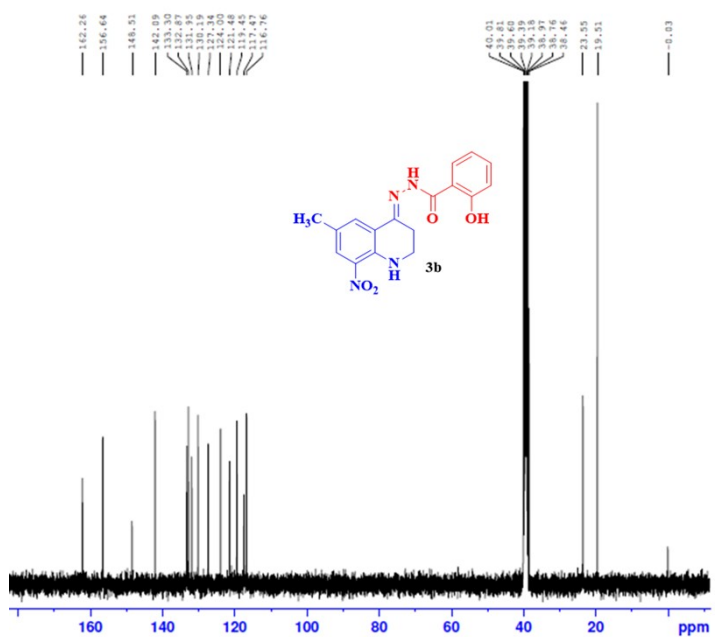





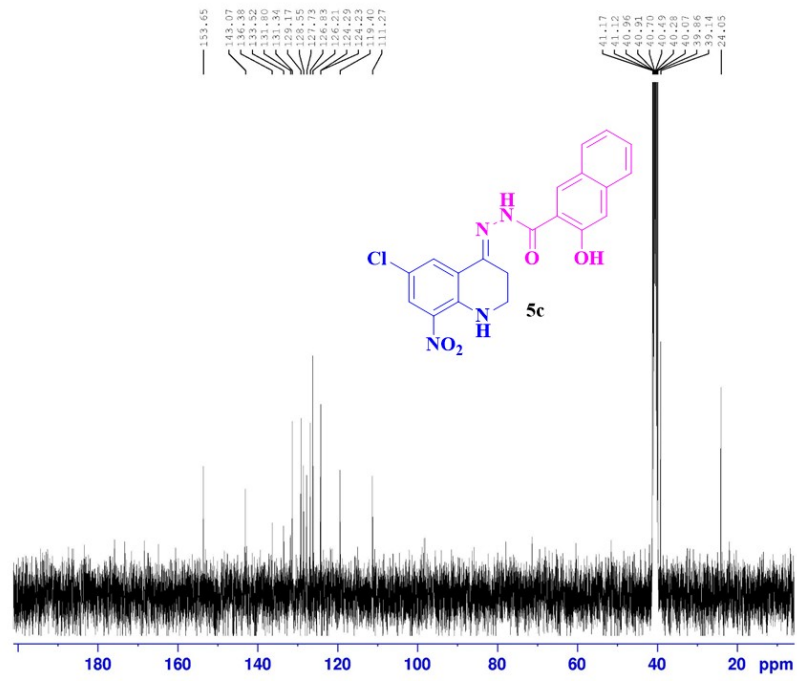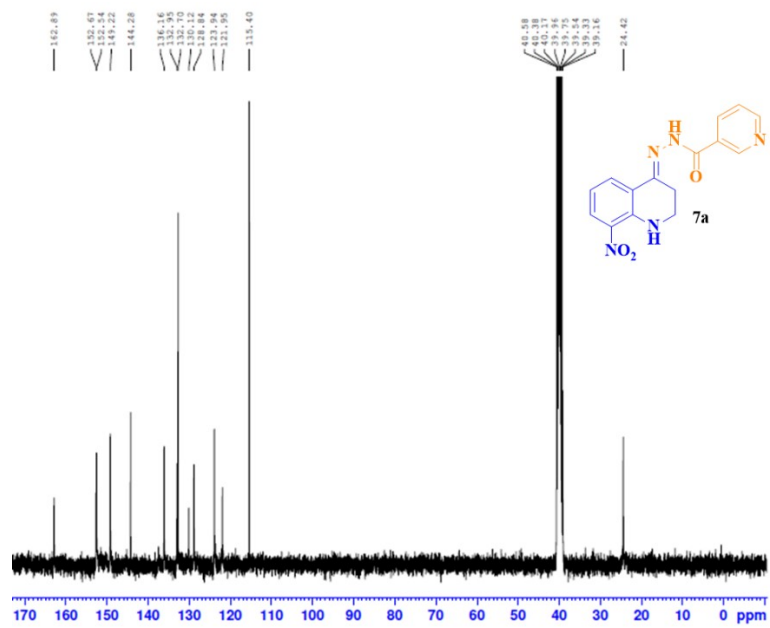

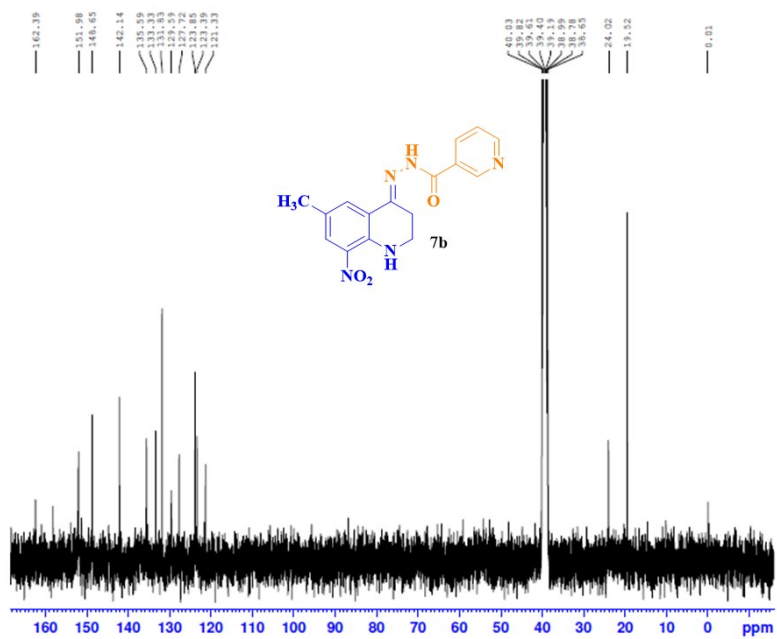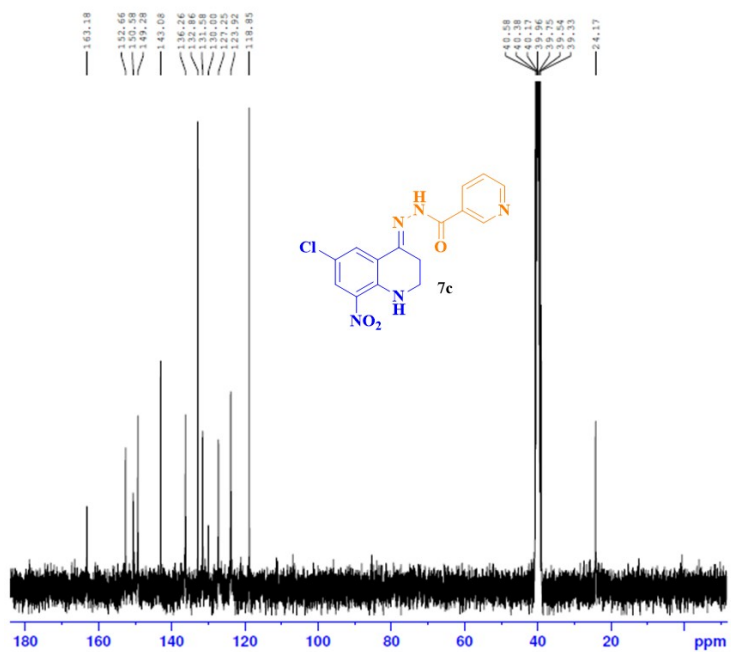

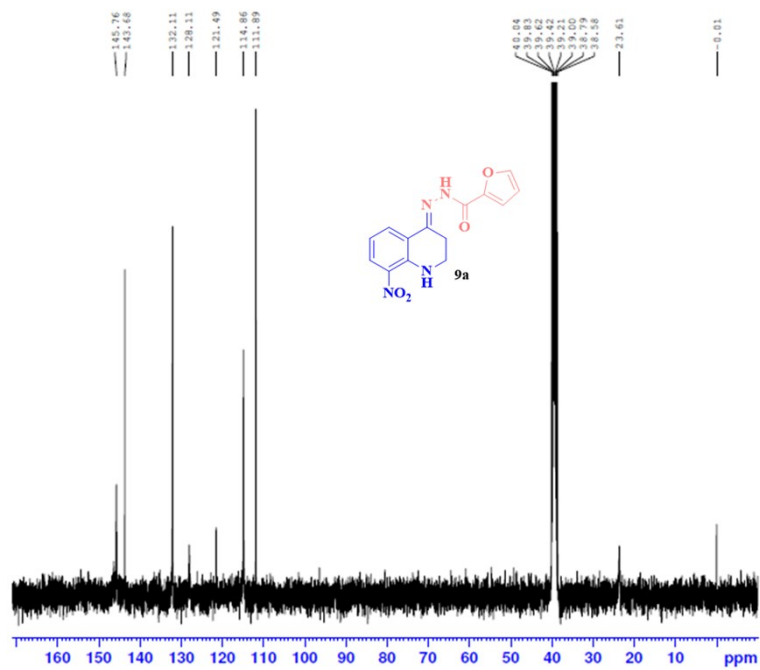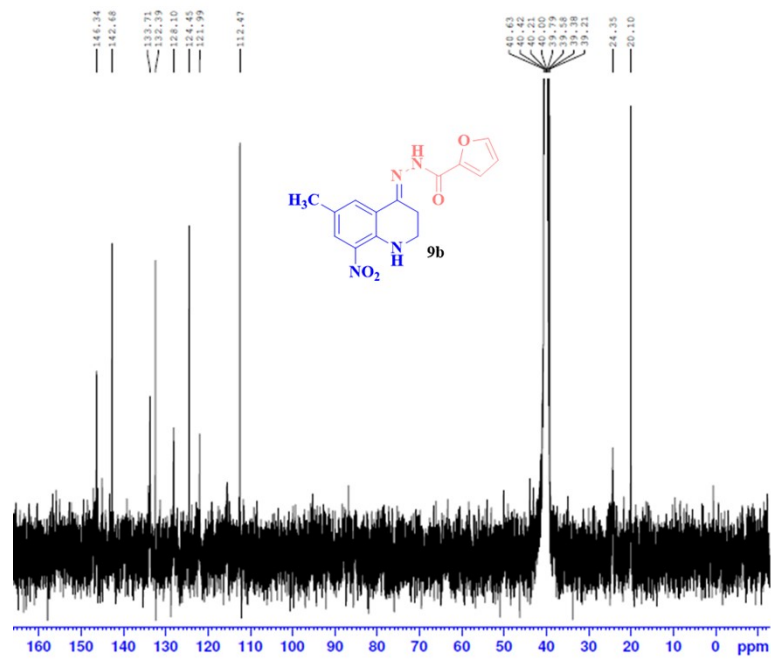

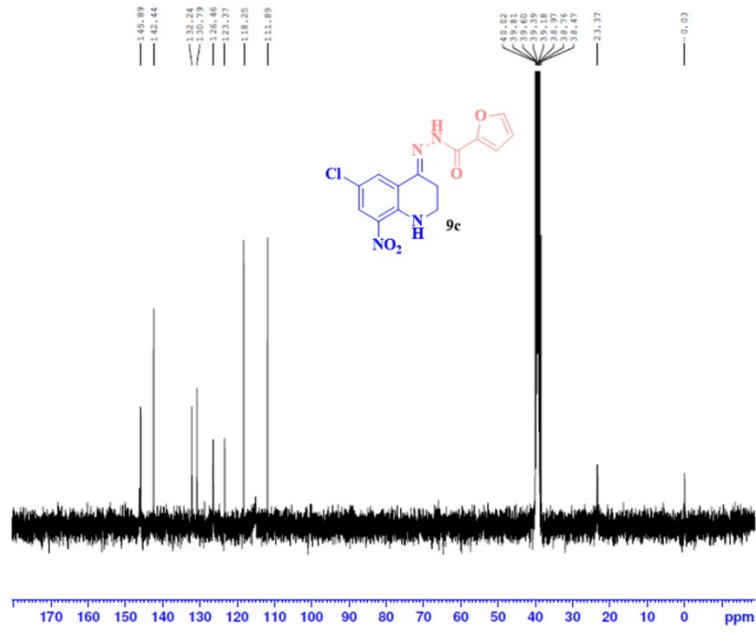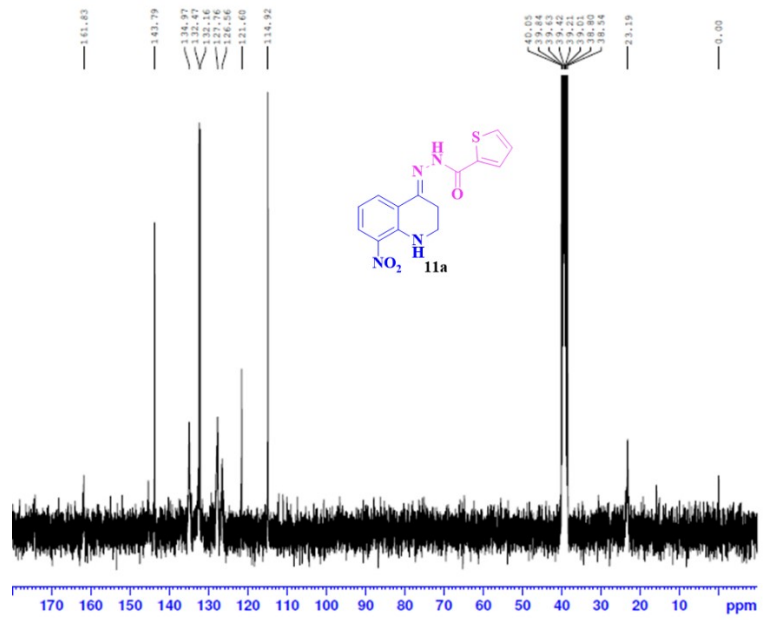

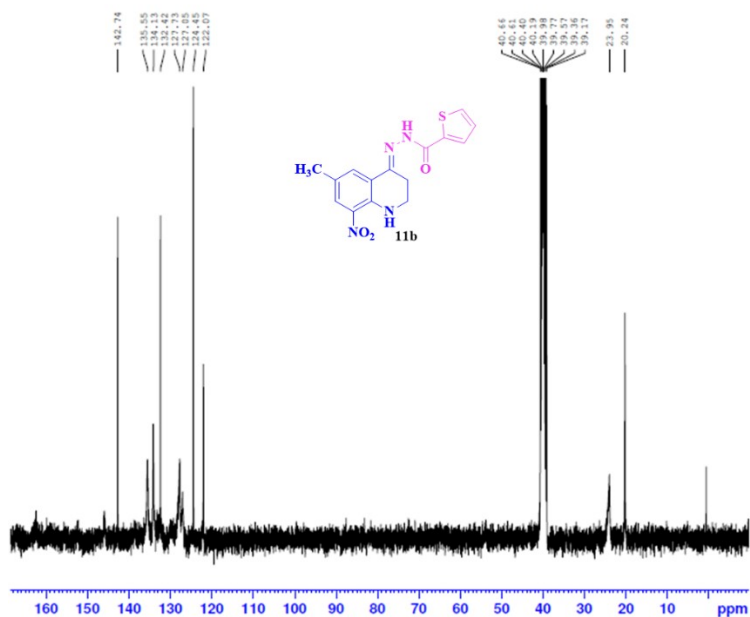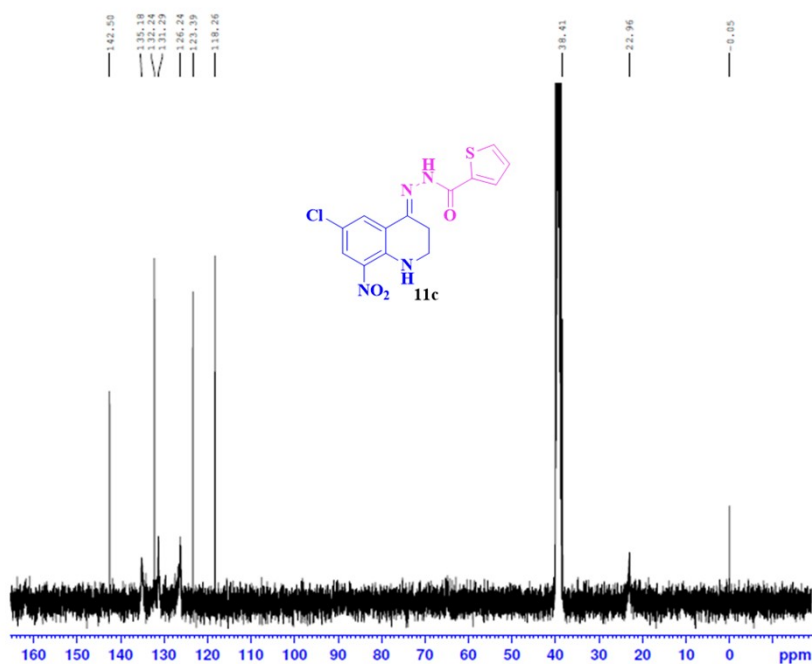

### III. CRYSTALLOGRAPHIC DATA:

| Parameters     | 9b                                                                                                   | 11a                                                                                       |
|----------------|------------------------------------------------------------------------------------------------------|-------------------------------------------------------------------------------------------|
| Bond precision | C-C = 0.0028 Å                                                                                       | C-C = 0.0028 Å                                                                            |
| Wavelength     | 0.71073                                                                                              | 0.71073                                                                                   |
| Cell           | a=10.1670(5)<br>b=10.1947(4)<br>c=14.5421(6)<br>alpha=78.485(3)<br>beta=78.991(4)<br>gamma=86.483(4) | a=9.0301(4),<br>b=13.7515(7),<br>c=11.0994(7)<br>alpha=90,<br>beta=94.892(5),<br>gamma=90 |
| Temperature:   | 295 K                                                                                                | 295 K                                                                                     |
| Volume         | 1449.34(11)                                                                                          | 1373.27(13)                                                                               |

|                   |               |                 |
|-------------------|---------------|-----------------|
| Space group       | P -1          | P 21/n          |
| Hall group        | -P 1          | -P 2yn          |
| Moiety formula    | C15 H14 N4 O4 | C14 H12 N4 O3 S |
| Sum formula       | C15 H14 N4 O4 | C14 H12 N4 O3 S |
| Mr                | 314.30        | 316.34          |
| Dx,g cm-3         | 1.440         | 1.530           |
| Z                 | 4             | 4               |
| Mu (mm-1)         | 0.108         | 0.255           |
| F000              | 656.0         | 656.0           |
| F000'             | 656.32        | 656.77          |
| h,k,lmax          | 13,14,19      | 12,18,15        |
| Nref              | 7869          | 3773            |
| Tmin,Tmax         | 0.976,0.991   | 0.964,0.990     |
| Tmin'             | 0.972         | 0.933           |
| Data completeness | 0.870         | 0.858           |
| Theta(max)        | 29.259        | 29.343          |
| R(reflections)    | 0.0512( 4391) | 0.0447( 2338)   |
| wR2(reflections)  | 0.1472( 6848) | 0.1203( 3238)   |
| S                 | 1.015         | 1.025           |
| Npar              | 453           | 207             |

#### IV. HRMS SPECTRA

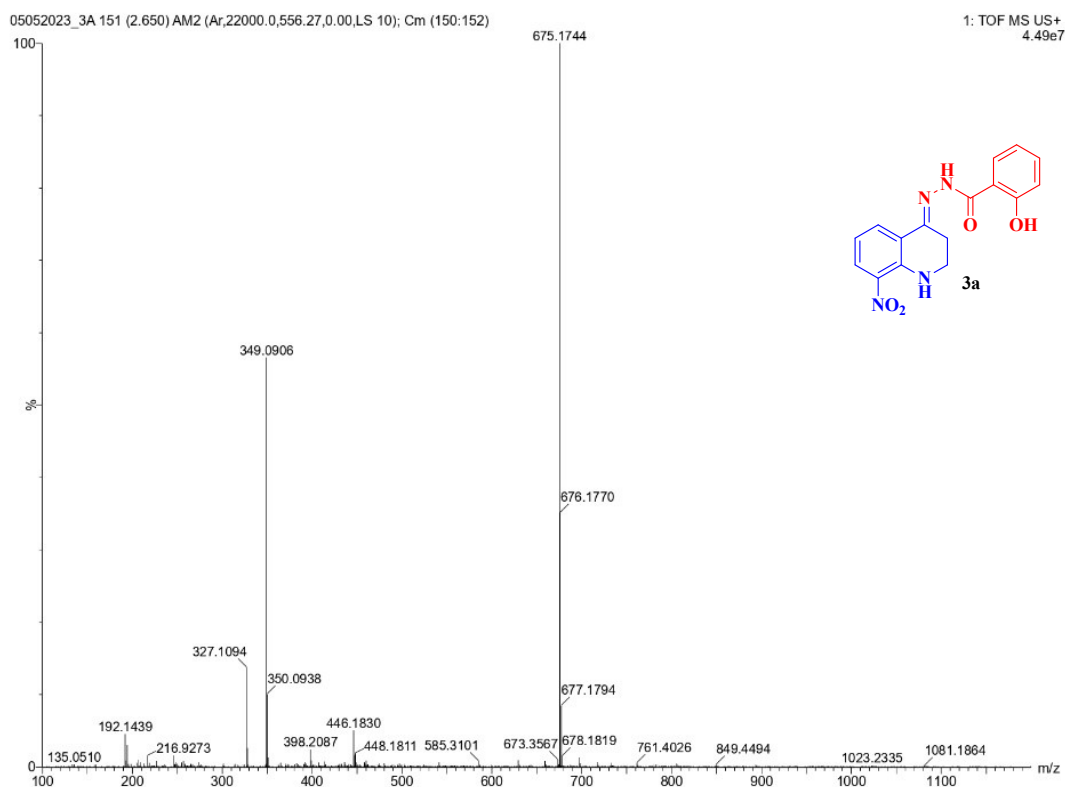

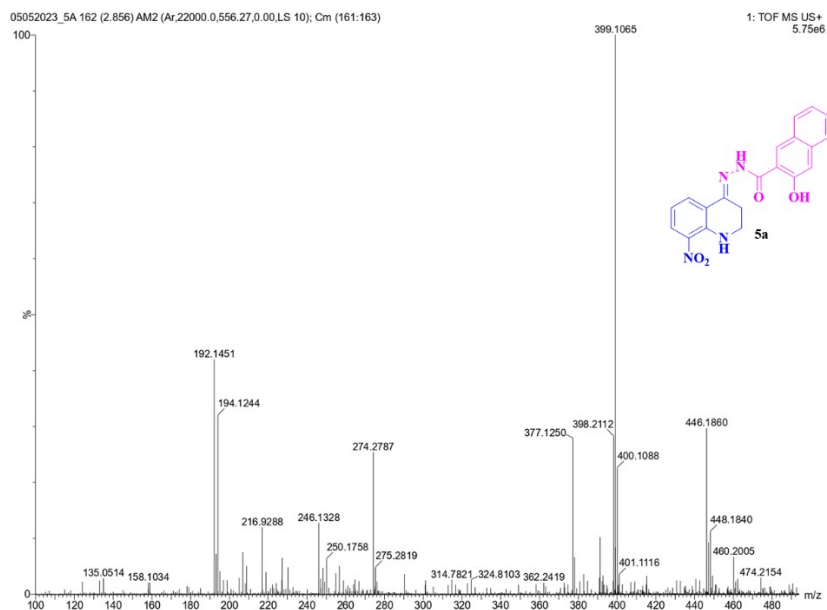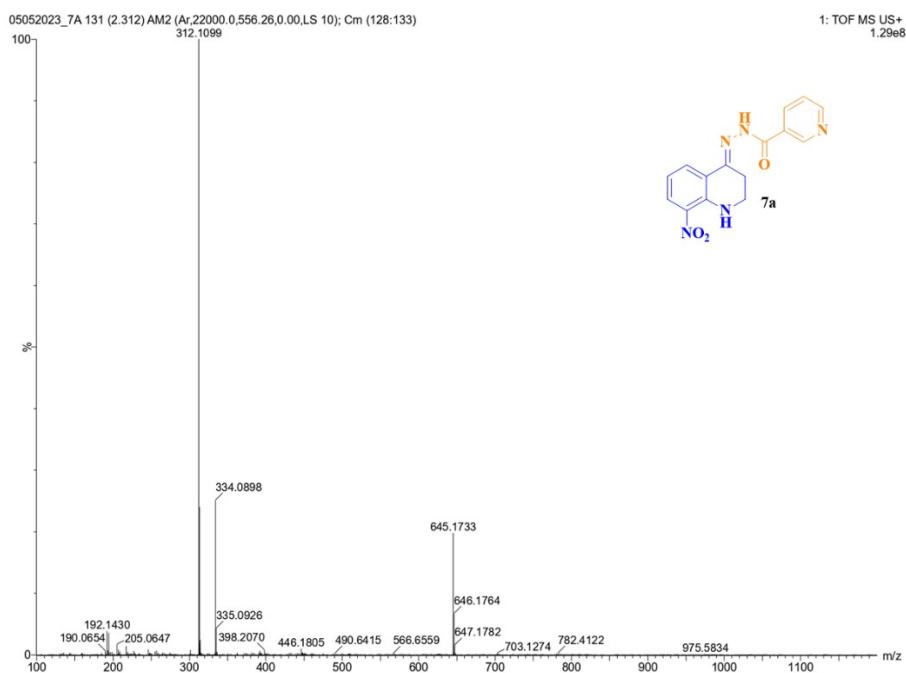

## V. THEORETICAL ADMET PARAMETERS:

### A. PHYSICO- CHEMICAL PARAMETERS:

| Compounds | Molecular Weight | Fraction Csp3 | Rotatable bonds | H-bond acceptors | H-bond donors | TPSA   |
|-----------|------------------|---------------|-----------------|------------------|---------------|--------|
| 3a        | 326.31           | 0.12          | 4               | 5                | 3             | 119.54 |
| 3b        | 340.33           | 0.18          | 4               | 5                | 3             | 119.54 |



|     |        |      |   |   |   |        |
|-----|--------|------|---|---|---|--------|
| 3c  | 360.75 | 0.12 | 4 | 5 | 3 | 119.54 |
| 5a  | 376.37 | 0.1  | 4 | 5 | 3 | 119.54 |
| 5b  | 390.39 | 0.14 | 4 | 5 | 3 | 119.54 |
| 5c  | 410.81 | 0.1  | 4 | 5 | 3 | 119.54 |
| 7a  | 311.3  | 0.13 | 4 | 5 | 2 | 112.2  |
| 7b  | 325.32 | 0.19 | 4 | 5 | 2 | 112.2  |
| 7c  | 345.74 | 0.13 | 4 | 5 | 2 | 112.2  |
| 9a  | 300.27 | 0.14 | 4 | 5 | 2 | 112.45 |
| 9b  | 314.3  | 0.2  | 4 | 5 | 2 | 112.45 |
| 9c  | 334.71 | 0.14 | 4 | 5 | 2 | 112.45 |
| 11a | 316.34 | 0.14 | 4 | 4 | 2 | 127.55 |
| 11b | 330.36 | 0.2  | 4 | 4 | 2 | 127.55 |
| 11c | 350.78 | 0.14 | 4 | 4 | 2 | 127.55 |

#### B. LIPOHILICITY:

| <b>Compound</b> | <b>iLOGP</b> | <b>XLOGP3</b> | <b>WLOGP</b> | <b>MLOGP</b> | <b>Silicos-IT<br/>Log P</b> | <b>Consensus<br/>Log P</b> |
|-----------------|--------------|---------------|--------------|--------------|-----------------------------|----------------------------|
| 3a              | 1.98         | 2.86          | 1.68         | 0.91         | 0.24                        | 1.53                       |
| 3b              | 2.29         | 3.23          | 1.99         | 1.15         | 0.75                        | 1.88                       |
| 3c              | 2.12         | 3.49          | 2.33         | 1.42         | 0.89                        | 2.05                       |
| 5a              | 2.56         | 4.11          | 2.83         | 1.67         | 1.26                        | 2.49                       |
| 5b              | 2.63         | 4.48          | 3.14         | 1.89         | 1.78                        | 2.78                       |
| 5c              | 2.42         | 4.74          | 3.49         | 2.16         | 1.91                        | 2.94                       |
| 7a              | 1.83         | 1.6           | 1.37         | 1.2          | 0.17                        | 1.23                       |
| 7b              | 1.84         | 1.96          | 1.68         | 0.64         | 0.68                        | 1.36                       |
| 7c              | 1.71         | 2.22          | 2.02         | 1.72         | 0.81                        | 1.7                        |

|     |      |      |      |      |      |      |
|-----|------|------|------|------|------|------|
| 9a  | 2.12 | 2.06 | 1.57 | 0.98 | 0.12 | 1.37 |
| 9b  | 2.35 | 2.43 | 1.87 | 0.43 | 0.62 | 1.54 |
| 9c  | 2.15 | 2.69 | 2.22 | 1.51 | 0.77 | 1.87 |
| 11a | 2.2  | 2.68 | 2.03 | 1.77 | 1.37 | 2.01 |
| 11b | 2.17 | 3.04 | 2.34 | 1.22 | 1.87 | 2.13 |
| 11c | 1.99 | 3.31 | 2.69 | 2.3  | 2.02 | 2.46 |

### C. WATER SOLUBILITY

| <b>Compound</b> | <b>ESOL<br/>Log S</b> | <b>ESOL<br/>Class</b> | <b>Ali<br/>Log S</b> | <b>Ali Class</b>      | <b>Silicos-IT<br/>LogSw</b> | <b>Silicos-IT<br/>class</b> |
|-----------------|-----------------------|-----------------------|----------------------|-----------------------|-----------------------------|-----------------------------|
| <b>3a</b>       | -3.77                 | Soluble               | -5.03                | Moderately<br>soluble | -4.61                       | Moderately<br>soluble       |
| <b>3b</b>       | -4.08                 | Moderately<br>soluble | -5.41                | Moderately<br>soluble | -4.99                       | Moderately<br>soluble       |
| <b>3c</b>       | -4.37                 | Moderately<br>soluble | -5.68                | Moderately<br>soluble | -5.2                        | Moderately<br>soluble       |
| <b>5a</b>       | -4.92                 | Moderately<br>soluble | -6.33                | Poorly<br>soluble     | -6.25                       | Poorly<br>soluble           |
| <b>5b</b>       | -5.23                 | Moderately<br>soluble | -6.71                | Poorly<br>soluble     | -6.63                       | Poorly<br>soluble           |
| <b>5c</b>       | -5.52                 | Moderately<br>soluble | -6.98                | Poorly<br>soluble     | -6.84                       | Poorly<br>soluble           |
| <b>7a</b>       | -2.9                  | Soluble               | -3.57                | Soluble               | -4.82                       | Moderately<br>soluble       |
| <b>7b</b>       | -3.2                  | Soluble               | -3.94                | Soluble               | -5.2                        | Moderately<br>soluble       |
| <b>7c</b>       | -3.49                 | Soluble               | -4.21                | Moderately<br>soluble | -5.42                       | Moderately<br>soluble       |
| <b>9a</b>       | -3.11                 | Soluble               | -4.05                | Moderately<br>soluble | -4.41                       | Moderately<br>soluble       |
| <b>9b</b>       | -3.41                 | Soluble               | -4.43                | Moderately<br>soluble | -4.79                       | Moderately<br>soluble       |
| <b>9c</b>       | -3.7                  | Soluble               | -4.7                 | Moderately<br>soluble | -5.01                       | Moderately<br>soluble       |
| <b>11a</b>      | -3.6                  | Soluble               | -5.01                | Moderately<br>soluble | -4.46                       | Moderately<br>soluble       |
| <b>11b</b>      | -3.89                 | Soluble               | -5.38                | Moderately<br>soluble | -4.84                       | Moderately<br>soluble       |
| <b>11c</b>      | -4.19                 | Moderately<br>soluble | -5.66                | Moderately<br>soluble | -5.05                       | Moderately<br>soluble       |

#### D. PHARMACOKINETICS

|     | <b>GI absorp<br/>tion</b> | <b>BBB perme<br/>ant</b> | <b>Pgp<br/>substra<br/>te</b> | <b>CYP1<br/>A2<br/>inhibit<br/>or</b> | <b>CYP2C<br/>19<br/>inhibito<br/>r</b> | <b>CYP2<br/>C9<br/>inhibit<br/>or</b> | <b>CYP2<br/>D6<br/>inhibit<br/>or</b> | <b>CYP3<br/>A4<br/>inhibit<br/>or</b> | <b>log<br/>Kp<br/>(cm/s<br/>)</b> |
|-----|---------------------------|--------------------------|-------------------------------|---------------------------------------|----------------------------------------|---------------------------------------|---------------------------------------|---------------------------------------|-----------------------------------|
| 3a  | High                      | No                       | No                            | Yes                                   | No                                     | Yes                                   | No                                    | No                                    | -6.26                             |
| 3b  | High                      | No                       | No                            | Yes                                   | No                                     | Yes                                   | No                                    | Yes                                   | -6.08                             |
| 3c  | High                      | No                       | No                            | Yes                                   | No                                     | Yes                                   | No                                    | Yes                                   | -6.02                             |
| 5a  | High                      | No                       | No                            | Yes                                   | No                                     | Yes                                   | No                                    | Yes                                   | -5.68                             |
| 5b  | High                      | No                       | No                            | Yes                                   | No                                     | Yes                                   | No                                    | Yes                                   | -5.5                              |
| 5c  | High                      | No                       | No                            | Yes                                   | No                                     | Yes                                   | No                                    | Yes                                   | -5.44                             |
| 7a  | High                      | No                       | Yes                           | No                                    | No                                     | No                                    | No                                    | No                                    | -7.06                             |
| 7b  | High                      | No                       | Yes                           | Yes                                   | No                                     | No                                    | No                                    | Yes                                   | -6.89                             |
| 7c  | High                      | No                       | No                            | Yes                                   | No                                     | No                                    | No                                    | No                                    | -6.83                             |
| 9a  | High                      | No                       | No                            | Yes                                   | No                                     | No                                    | No                                    | No                                    | -6.67                             |
| 9b  | High                      | No                       | No                            | Yes                                   | No                                     | Yes                                   | No                                    | Yes                                   | -6.49                             |
| 9c  | High                      | No                       | No                            | Yes                                   | No                                     | Yes                                   | No                                    | Yes                                   | -6.43                             |
| 11a | High                      | No                       | No                            | Yes                                   | Yes                                    | Yes                                   | No                                    | No                                    | -6.33                             |
| 11b | High                      | No                       | No                            | Yes                                   | Yes                                    | Yes                                   | No                                    | Yes                                   | -6.16                             |
| 11c | High                      | No                       | No                            | Yes                                   | Yes                                    | Yes                                   | No                                    | Yes                                   | -6.09                             |

#### E. DRUG LIKENESS:

| <b>Compound</b> | <b>Lipinski<br/>violation</b> | <b>Ghose<br/>violation</b> | <b>Veber<br/>violation</b> | <b>Egan<br/>violation</b> | <b>Muegge<br/>violation</b> | <b>Bioavailabilit<br/>y Score</b> |
|-----------------|-------------------------------|----------------------------|----------------------------|---------------------------|-----------------------------|-----------------------------------|
| <b>3a</b>       | 0                             | 0                          | 0                          | 0                         | 0                           | 0.55                              |
| <b>3b</b>       | 0                             | 0                          | 0                          | 0                         | 0                           | 0.55                              |
| <b>3c</b>       | 0                             | 0                          | 0                          | 0                         | 0                           | 0.55                              |
| <b>5a</b>       | 0                             | 0                          | 0                          | 0                         | 0                           | 0.55                              |
| <b>5b</b>       | 0                             | 0                          | 0                          | 0                         | 0                           | 0.55                              |
| <b>5c</b>       | 0                             | 0                          | 0                          | 0                         | 0                           | 0.55                              |

|            |   |   |   |   |   |      |
|------------|---|---|---|---|---|------|
| <b>7a</b>  | 0 | 0 | 0 | 0 | 0 | 0.55 |
| <b>7b</b>  | 0 | 0 | 0 | 0 | 0 | 0.55 |
| <b>7c</b>  | 0 | 0 | 0 | 0 | 0 | 0.55 |
| <b>9a</b>  | 0 | 0 | 0 | 0 | 0 | 0.55 |
| <b>9b</b>  | 0 | 0 | 0 | 0 | 0 | 0.55 |
| <b>9c</b>  | 0 | 0 | 0 | 0 | 0 | 0.55 |
| <b>11a</b> | 0 | 0 | 0 | 0 | 0 | 0.55 |
| <b>11b</b> | 0 | 0 | 0 | 0 | 0 | 0.55 |
| <b>11c</b> | 0 | 0 | 0 | 0 | 0 | 0.55 |

F. TOXICITY:

| <b>Toxicity parameter</b>                         | <b>3a</b> | <b>3b</b> | <b>3c</b> | <b>5a</b> | <b>5b</b> | <b>5c</b> |
|---------------------------------------------------|-----------|-----------|-----------|-----------|-----------|-----------|
| AMES toxicity                                     | YES       | Yes       | No        | Yes       | Yes       | Yes       |
| Maximum tolerated dose (human) in mg/kg/day       | -0.138    | -0.146    | -0.127    | 0.304     | 0.168     | 0.181     |
| hERG I inhibitor                                  | No        | No        | No        | No        | No        | No        |
| hERG II inhibitor                                 | No        | Yes       | No        | Yes       | Yes       | Yes       |
| Oral rate acute toxicity (LD50) in mol/kg         | 2.34      | 3.123     | 3.142     | 2.765     | 2.648     | 2.665     |
| Oral rat chronic toxicity (LOAEL) in mg/kg_bw/day | 2.532     | 2.36      | 2.407     | 2.402     | 2.403     | 2.45      |
| Hepatotoxicity                                    | No        | No        | No        | Yes       | Yes       | Yes       |
| Skin sensitisation                                | No        | No        | No        | No        | No        | No        |
| T.pyrifurms toxicity in log ug/l                  | 0.752     | 0.513     | 0.504     | 0.327     | 0.307     | 0.305     |
| Minnow toxicity in log mM                         | 1.073     | 0.068     |           | 1.86      | -0.502    | -0.719    |
